# Supplementary material for: Genetic basis of STEM occupational choice and regional economic performance: A UK Biobank Genome-wide Association Study
Source: Research Square preprint supplement (doi:10.21203/rs.3.rs-2040131/v1), 2022-09-12
Supplement: Supplementary file 1 [file 613578ca18e3a7c50c81e399.docx]

**Supplementary Table 1**. List of STEM occupations

| SOC2000 | STEM Occupation |
| --- | --- |
| 21110 | Chemists |
| 21111 | Research/Development Chemists |
| 21112 | Analytical Chemists |
| 21120 | Biological Scientists and Biochemists |
| 21121 | Biochemists, Medical Scientists |
| 21122 | Biologists |
| 21123 | Bacteriologists, Microbiologists etc. |
| 21124 | Botanists |
| 21125 | Pathologists |
| 21126 | Agricultural Scientists |
| 21127 | Physiologists |
| 21130 | Physicists, Geologists and Meteorologists |
| 21131 | Physicists |
| 21132 | Geophysicists |
| 21133 | Geologists, Mineralogists etc. |
| 21134 | Meteorologists |
| 21135 | Astronomers |
| 21136 | Mathematicians |
| 21210 | Civil Engineers |
| 21211 | Water, Sanitation, Drainage and Public Health Engineers |
| 21212 | Mining, Quarrying and Drilling Engineers |
| 21213 | Construction Engineers |
| 21220 | Mechanical Engineers |
| 21221 | Aeronautical Engineers |
| 21222 | Automobile Engineers |
| 21223 | Marine Engineers |
| 21224 | Plant and Maintenance Engineers |
| 21230 | Electrical Engineers |
| 21231 | Electricity Generation and Supply Engineers |
| 21232 | Telecommunications Engineers |
| 21240 | Electronic Engineers |
| 21241 | Broadcasting Engineers |
| 21242 | Avionics, Radar and Communications Engineers |
| 21250 | Chemical Engineers |
| 21260 | Design and Development Engineers |
| 21270 | Production and Process Engineers |
| 21280 | Planning and Quality Control Engineers |
| 21281 | Planning Engineers |
| 21282 | Quality Control Engineers |
| 21290 | Engineering Professionals Nec |
| 21291 | Metallurgists and Material Scientists |
| 21292 | Patents Examiners, Agents and Officers |
| 21293 | Heating and Ventilating Engineers |
| 21294 | Food and Drink Technologists (including brewers) |
| 21295 | Acoustic Engineers |
| 21310 | IT Strategy and Planning Professionals |
| 21311 | IT Consultants and Planners |
| 21312 | Telecommunications Consultants and Planners |
| 21320 | Software Professionals |
| 21321 | Software Designers and Engineers |
| 21322 | Computer Analysts and Programmers |
| 21323 | Network/Systems Designers and Engineers |
| 21324 | Web Developers and Producers |
